# Supplementary material
Source: publisher figshare collection journal article supplement (https://acs.figshare.com/ndownloader/files/4183303)
Supplement: Supplementary file 1 [file 4183303]

# C–H Bond Activation of Methane via $\sigma$ –d Interaction on the IrO<sub>2</sub>(110) Surface: Density Functional Theory Study

*Chia-Ching Wang, Shih Syong Siao, and Jyh-Chiang Jiang\**

Department of Chemical Engineering, National Taiwan University of Science and Technology, 43,  
Keelung Road, Section 4, Taipei, 106, Taiwan

## Supporting Information

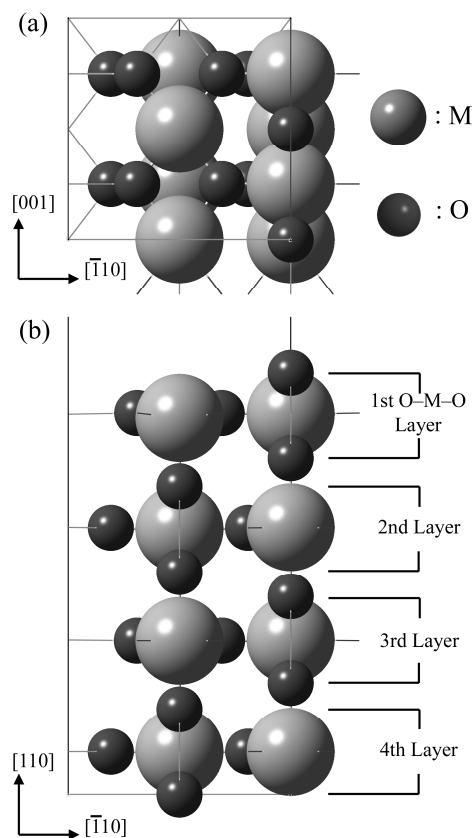

**Figure S1.** (a) Top and (b) side views and layer definition of the  $\text{MO}_2(110)$  ( $\text{M} = \text{Ir}, \text{Ru}$  or  $\text{Ti}$ ) surface models applied in this work.

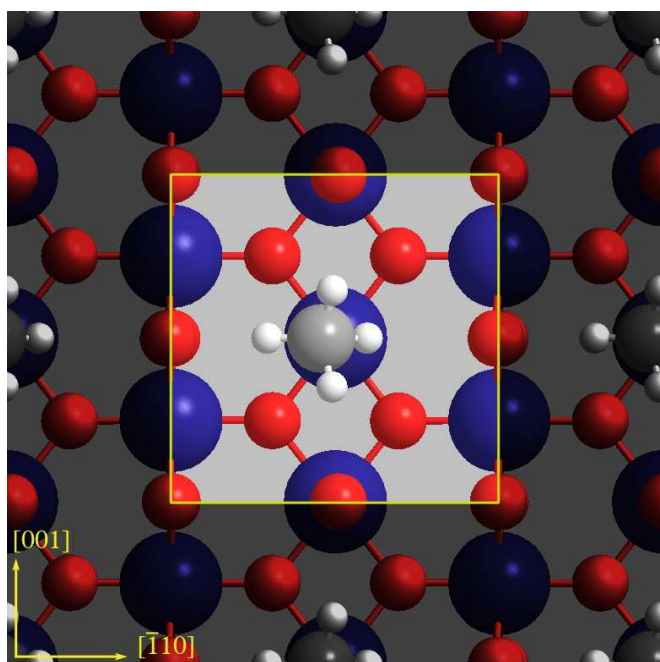

**Figure S2.** The top view of methane adsorption on the oxygen-rich  $\text{IrO}_2(110)$  surface. The central rectangular demonstrates the  $2 \times 1$  supercell.

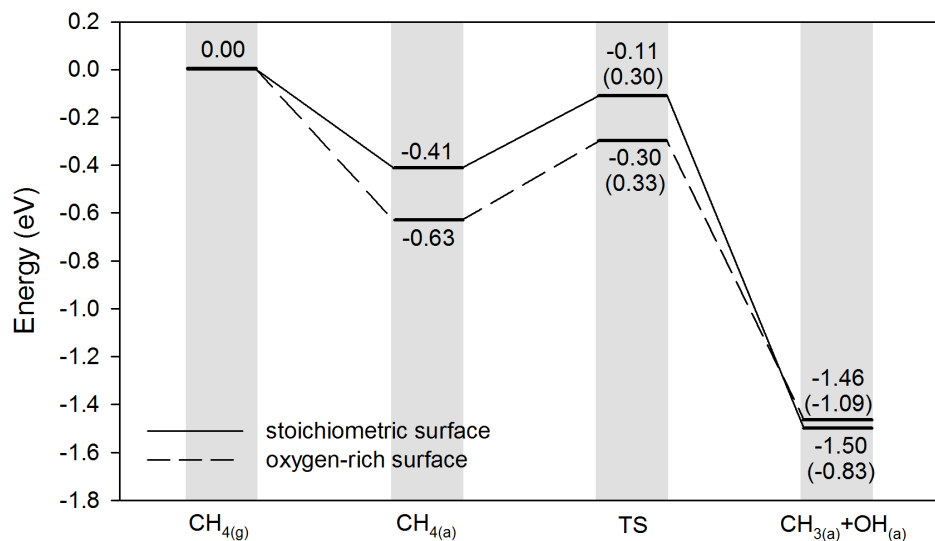

**Figure S3.** The potential energy surface of methane adsorption and the hydrogen atom abstraction reaction on IrO<sub>2</sub>(110) surfaces.

**TABLE S1: Selected Geometric Parameters (Å) of Transition State and Final State of Hydrogen Atom Abstraction by the Stoichiometric IrO<sub>2</sub>(110) Surface**

|                                      | Transition State | Final State |
|--------------------------------------|------------------|-------------|
| $d(\text{C-H}_a)$                    | 1.11             | 1.10        |
| $d(\text{C-H}_b)$                    | 1.40             | 2.36        |
| $d(\text{C-H}_c)$                    | 1.11             | 1.11        |
| $d(\text{O}_{\text{br}}-\text{H}_b)$ | 1.28             | 0.98        |
| $d(\text{Ir}_{\text{cus}}-\text{C})$ | 2.26             | 2.07        |
